# Supplementary material for: Arzneimitteltherapiesicherheit gefördert durch die interprofessionelle Zusammenarbeit von Arzt und Apotheker auf Intensivstationen in Deutschland
Source: Springer Nature journal article supplement (doi:10.1007/s00063-022-00898-5), 2022-03-08
Supplement: MOESM1 [file 20201404]

**Willkommen zur Umfrage:  
Stationsapotheker/innen auf deutschen Intensivstationen**

Sehr geehrte Damen und Herren,

die Sektion Qualitätssicherung der Deutschen Interdisziplinären Vereinigung für Intensiv- und Notfallmedizin (DIVI) und der Ausschuss für Intensivmedizin und klinische Ernährung des Bundesverbandes Deutscher Krankenhausapotheker e.V. (ADKA) führen gemeinsam diese Umfrage zur Tätigkeit der Apotheker/innen auf deutschen Intensivstationen durch und bitten um Ihre Unterstützung.

Pharmazeutische Interventionen (PI) tragen zur Arzneimitteltherapie- und Patientensicherheit im Krankenhaus bei. Der positive Nutzen der Apotheker auf einer Intensivstation bezogen auf die Reduktion von Medikationsfehlern und vermeidbaren unerwünschten Arzneimittelereignissen sowie den damit assoziierten Kosten, als auch der positive Einfluss auf klinische Parameter wie z.B. Mortalität und Aufenthaltsdauer sind in der internationalen Literatur hinreichend veröffentlicht. Daneben sind die Krankenhausapotheker/innen ein wichtiges und geschätztes Mitglied des interdisziplinären Teams einer Intensivstation.

Die in der internationalen Literatur veröffentlichten hohen Akzeptanzraten (74%- 99%) von PI unterstützten diese Aussage.

Bereits im Jahr 2000 erfolgte eine detaillierte Beschreibung der Tätigkeitsfelder der Stationsapotheker in der Intensivmedizin in den USA. Die DIVI Empfehlungen zur Struktur und Ausstattung von Intensivstationen empfehlen die Aufnahme ins interprofessionelle Team und fordern die Teilnahme der Apotheker mindestens einmal wöchentlich an der Visite (Empfehlungsgrad 1B) sowie eine konsiliarische Verfügbarkeit (Empfehlungsgrad 1C). Derzeit liegen für Deutschland keine Daten zum Einsatz von Apotheker/innen auf Intensivstationen und zur Umsetzung dieser Empfehlung der DIVI vor.

Gemeinsam mit der ADKA überprüft die DIVI mit dieser Umfrage die Umsetzung dieser Empfehlung und bestimmt das Ausmaß der Beteiligung der Apotheker im klinischen Alltag auf Intensivstationen. Bitte setzen Sie sich – falls zur Beantwortung der Fragen erforderlich – mit Ihren Apotheker/innen in Verbindung.

Die Ergebnisse der Umfrage werden durch die DIVI und die ADKA ausgewertet und veröffentlicht. Alle Angaben des Fragebogens werden anonymisiert erhoben. Die Auswertung aller Daten erfolgt vollständig anonymisiert ausschließlich durch die beteiligten Berufsverbände. Es erfolgt keine Weitergabe Ihrer E-Mail-Adresse an Dritte. Nach Abschluss der Datenauswertung erhalten Sie eine Analyse der Daten, bezogen auf die Versorgungsstufe des Krankenhauses.

gez.

H.Hilgarth

(Fachapothekerin für Klinische Pharmazie)

i.A. der Sektion Qualitätssicherung der Deutschen Interdisziplinären Vereinigung für Intensiv- und Notfallmedizin (DIVI)

und der Ausschuss für Intensivmedizin und klinische Ernährung des Bundesverbandes Deutscher Krankenhausapotheker e.V. (ADKA)

Allgemeine Daten zum Krankenhaus

\* 1. Ihr Krankenhaus gehört der folgenden Versorgungsstufe an:

- Regelversorgung                       Schwerpunktversorgung                       Maximalversorgung

\* 2. Welcher Berufsgruppe gehören Sie an?

- Chefärztin/Chefarzt                       Fachärztin/Facharzt                       andere  
 Oberärztin/Oberarzt                       Assistenzärztin/Assistenzarzt

\* 3. Wie viele Betten hat Ihr Krankenhaus?

- < 400                       400 - 800  
 > 800

4. Für wie viele Intensiv-Betten sind Sie verantwortlich?

5. Für wie viele IMC-Betten sind Sie verantwortlich?

\* 6. Wie viele Intensiv-/ IMC-Stationen gibt es in Ihrem Haus?

- eine                       zwei                       drei  
 mehr als 3

\* 7. In welchem Bereich sind Sie tätig?

- Intensivmedizin (Erwachsene)                       Intensivmedizin (Kinder)  
 Intermediate Care Station (Erwachsene)                       Intermediate Care Station (Kinder)

\* 8. Haben Sie ein elektronisches Verordnungssystem, in dem Sie täglich papierlos verordnen?

- JA  
 NEIN

Elektronische Akte

**Diese Fragen werden nur von Krankenhäusern beantwortet, die über ein elektronisches Verordnungssystem verfügen.**

9. Ein elektronisches Verordnungssystem ist in Ihrem Krankenhaus auf ...

- allen Stationen aktiv
- nur im Bereich der Intensivmedizin verfügbar
- auf einzelnen Stationen aktiv

10. Verfügt Ihr elektronisches Verordnungssystem über eine oder mehrere der unten aufgeführten Funktionen?

|                                                                              | JA                    | NEIN                  | Weiß ich nicht        |
|------------------------------------------------------------------------------|-----------------------|-----------------------|-----------------------|
| Standardisierte Allergiewarnung                                              | <input type="radio"/> | <input type="radio"/> | <input type="radio"/> |
| automatischen Interaktionscheck der verordneten Medikamente                  | <input type="radio"/> | <input type="radio"/> | <input type="radio"/> |
| automatische Warnung bei Überschreitung der Maximaldosis                     | <input type="radio"/> | <input type="radio"/> | <input type="radio"/> |
| automatische Warnung bei Doppelverordnung                                    | <input type="radio"/> | <input type="radio"/> | <input type="radio"/> |
| automatische Hinweise zur Dosisanpassung (Nieren- und Leberfunktionsstörung) | <input type="radio"/> | <input type="radio"/> | <input type="radio"/> |
| automatische Warnung bei Inkompatibilität parenteraler Zubereitungen         | <input type="radio"/> | <input type="radio"/> | <input type="radio"/> |

**Diese Seite bezieht sich auf die Tätigkeit der Apotheker/innen auf der Intensivstation bzw. umfasst Fragen zur pharmazeutischen Betreuung.**

\* 11. Werden Ihre Intensiv-/ IMC-Stationen regelmäßig durch Apotheker/innen pharmazeutisch betreut? Zum Beispiel durch die Teilnahme an Visiten, konsiliarische Tätigkeiten, Medikationsanamnese oder regelmäßige Interaktionschecks.

JA

NEIN

Wenn JA, wie viele Betten durch wie viele Apotheker/innen (VK)?

**Diese Seite bezieht sich auf die Tätigkeit der Apotheker/innen auf der Intensivstation bzw. umfasst Fragen zur pharmazeutischen Betreuung.**

12. Welche Fachrichtungen werden regelmäßig durch Apotheker/innen betreut? (Mehrfachantworten möglich)

- internistische Intensivmedizin (z.B. Gastroenterologie, Pneumologie)
- nicht-operative Intensivmedizin (z.B. Neurologie, Kardiologie)
- anästhesiologische und chirurgische Intensivmedizin
- interdisziplinäre Intensivmedizin (nicht-operativ)
- interdisziplinäre Intensivmedizin (operativ)
- Überwachungsstation(IMC)/Stroke Units
- pädiatrische Intensivmedizin (inkl. Neonatologie)
- Sonstiges (bitte angeben)

13. Welche Tätigkeiten führen Apotheker/innen im Rahmen der pharmazeutischen Betreuung durch?

(Mehrfachantworten möglich)

- |                                                                                                                                                        |                                                                                                                   |
|--------------------------------------------------------------------------------------------------------------------------------------------------------|-------------------------------------------------------------------------------------------------------------------|
| <input type="checkbox"/> Bereitstellung von Arzneimittelinformation für medizinisches und pflegerisches Personal                                       | <input type="checkbox"/> Therapeutisches Drugmonitoring OHNE Beratung (z.B. Antiepileptika und Antiinfektiva)     |
| <input type="checkbox"/> Medication Reconciliation (Überprüfung der Medikation auf Vollständigkeit)                                                    | <input type="checkbox"/> Empfehlungen zur Ernährungstherapie bzw. Bereitstellung individueller Regime/Konzepte    |
| <input type="checkbox"/> Regelmäßige Evaluation der Medikation hinsichtlich Indikation, Dosis, Interaktion, Anamnese etc.                              | <input type="checkbox"/> Teilnahme ODER Durchführung von Schulungen/Fortbildung im Bereich Intensivmedizin/ IMC   |
| <input type="checkbox"/> Überwachung der Medikation hinsichtlich Nebenwirkung, Effektivität und Kosten                                                 | <input type="checkbox"/> Involvierung (aktiv) in Forschungsaktivitäten in der Intensivmedizin                     |
| <input type="checkbox"/> Interventionen, die zur Therapieumstellung, Eskalation oder Deeskalation führen - z.B. durch interaktive Teilnahme an Visiten | <input type="checkbox"/> Telefonische Konsultation der Apotheker/innen ist rund um die Uhr verfügbar              |
| <input type="checkbox"/> Therapeutisches Drugmonitoring UND Beratung (z.B. Antiepileptika und Antiinfektiva)                                           | <input type="checkbox"/> Sind Apotheker/innen in das CIRS/Risikomanagement der Intensivmedizin / IMC eingebunden? |
| <input type="checkbox"/> Sonstiges (bitte angeben)                                                                                                     |                                                                                                                   |

14. Wie häufig nehmen Apotheker/innen an Visiten in der Intensivmedizin/ IMC-Station teil?

- täglich       2-3 mal pro Woche       1 mal pro Woche       gar nicht
- auf Anfrage

15. Wie viel Zeit verbringen die Apotheker/innen im Rahmen der pharmazeutischen Betreuung in der Intensivmedizin/auf IMC-Station. Bitte schätzen Sie die Dauer in Stunden pro Tag ab.

- weniger als 0,5 h       0,5 - 2 h       2 -5 h
- mehr als 3 h

Zusammenarbeit zwischen Apotheker/innen und der Intensivstation

\* 16. Wer sind die häufigsten Ansprechpartner für Apotheker/innen auf Intensiv oder IMC-Station?  
(Mehrfachantworten möglich)

- Chefärztin/Chefarzt       Fachärztin/Facharzt       Pflegemitarbeiter/innen  
 Oberärztin/Oberarzt       Assistenzärztin/Assistenzarzt

\* 17. Wie erfolgt in der Regel die Kommunikation der Apotheker/innen im Rahmen der pharmazeutischen Betreuung? (Mehrfachantworten möglich)

- mündlich (persönlich OHNE Dokumentation in der Akte, z.B. Teilnahme an Visiten)  
 mündlich UND schriftlich in der Akte der Patienten  
 schriftlich z.B. durch Konsile  
 telefonisch

\* 18. Sind die Apotheker/innen regelmäßig an der Erstellung/Erarbeitung von Klinik/Stationsstandards/Behandlungsstandards bzw. SOPs oder Verfahrensanweisungen beteiligt?

- JA       NEIN  
 Weiß ich nicht.

\* 19. Sind die Apotheker/innen regelmäßig an der Erstellung von Budget- und Kosten-Nutzen Analysen beteiligt?

- JA       NEIN  
 Weiß ich nicht.

20. Die für Sie zuständigen Apotheker/innen betreuen ausschließlich die Intensivstationen/IMC?

- JA       NEIN  
 Weiß ich nicht.

21. Über wie viele Jahre Berufserfahrung verfügen die für Sie zuständigen Apotheker/innen?

- < 5 Jahre       5 - 10 Jahre       > 10 Jahre  
 Weiß ich nicht.

---

Apotheker/innen auf Intensivstation

Anforderungen an die pharmazeutische Betreuung.



\* 22. Welche Tätigkeiten wünschen Sie sich und wie gewichten Sie die Arbeit der Apotheker/innen auf der Station? Bitte antworten Sie auch, falls Sie noch nicht durch Apotheker/innen regelmäßig aktiv betreut werden.

|                                                                                      | essenziell/unverzichtbar | wünschenswert         | optional              |
|--------------------------------------------------------------------------------------|--------------------------|-----------------------|-----------------------|
| Bereitstellung von Arzneimittelinformation                                           | <input type="radio"/>    | <input type="radio"/> | <input type="radio"/> |
| Teilnahme an Visiten                                                                 | <input type="radio"/>    | <input type="radio"/> | <input type="radio"/> |
| Überprüfung der Medikation auf Vollständigkeit (MedRec)                              | <input type="radio"/>    | <input type="radio"/> | <input type="radio"/> |
| Regelmäßige Evaluation der Verordnung (Indikation, Dosis, Interaktion)               | <input type="radio"/>    | <input type="radio"/> | <input type="radio"/> |
| Überwachung der Medikation (Nebenwirkung, Effektivität, Kosten)                      | <input type="radio"/>    | <input type="radio"/> | <input type="radio"/> |
| Interventionen, die zur Therapieumstellung ggfs Deeskalation führen                  | <input type="radio"/>    | <input type="radio"/> | <input type="radio"/> |
| Therapeutisches Drugmonitoring UND Beratung                                          | <input type="radio"/>    | <input type="radio"/> | <input type="radio"/> |
| Therapeutisches Drugmonitoring OHNE Beratung                                         | <input type="radio"/>    | <input type="radio"/> | <input type="radio"/> |
| Empfehlungen zur Ernährungstherapie bzw Bereitstellung individueller Regime/Konzepte | <input type="radio"/>    | <input type="radio"/> | <input type="radio"/> |
| Teilnahme UND/ODER Durchführung von Schulungen/Fortbildungen in der Intensivmedizin  | <input type="radio"/>    | <input type="radio"/> | <input type="radio"/> |
| Aktive Teilnahme an Forschungsaktivitäten (z.B. Studien)                             | <input type="radio"/>    | <input type="radio"/> | <input type="radio"/> |
| Telefonische Erreichbarkeit des Apothekers (24h)                                     | <input type="radio"/>    | <input type="radio"/> | <input type="radio"/> |
| Einbindung in das CIRS/Risikomanagement                                              | <input type="radio"/>    | <input type="radio"/> | <input type="radio"/> |

23. Wie häufig sollten Apotheker/innen Ihrer Meinung nach an der Visite teilnehmen/auf der Station präsent sein?

- täglich
  2-3 mal pro Woche
  1 mal pro Woche
  gar nicht
- auf Anfrage

24. Falls noch keine Apotheker/innen an Visiten teilnehmen bzw. auf Ihrer Station präsent sind, soll eine solche Visitenteilnahme/Präsenz eingeführt werden?

- JA, eine Einführung ist geplant.  
 NEIN, eine Einführung ist nicht geplant.  
 Weiß ich nicht.

\* 25. Gibt es in Ihrem Haus bereits standardisierte Vorschriften/Empfehlungen für:

|                                                                    | JA                    | NEIN                  | Weiß ich nicht.       |
|--------------------------------------------------------------------|-----------------------|-----------------------|-----------------------|
| die Zubereitung von Perfusoren                                     | <input type="radio"/> | <input type="radio"/> | <input type="radio"/> |
| die Dosierungen bei Niereninsuffizienz (inkl. Dialyse)             | <input type="radio"/> | <input type="radio"/> | <input type="radio"/> |
| die Dosierungen bei Leberinsuffizienz                              | <input type="radio"/> | <input type="radio"/> | <input type="radio"/> |
| die initiale Antiinfektikatherapie (inkl. Dosierungen)             | <input type="radio"/> | <input type="radio"/> | <input type="radio"/> |
| die Vermeidung von Inkompatibilitäten bei parenteraler Applikation | <input type="radio"/> | <input type="radio"/> | <input type="radio"/> |

Sonstiges (bitte angeben)

\* 26. Erhalten Sie bereits aus der Apotheke vorbefüllte Perfusorspritzen? Wenn ja, bitte listen Sie die Wirkstoffe.

- JA  NEIN  
 Bitte listen Sie die Wirkstoffe:

\* 27. Findet in Ihrem Haus bzw. in der Intensivmedizin eine patientenindividuelle UNIT DOSE Versorgung statt?

- JA, im gesamten Krankenhaus (inkl. Intensivmedizin)
- JA, im gesamten Krankenhaus (außer Intensivmedizin)
- JA, auf einzelnen Stationen im Krankenhaus
- NEIN, es findet KEINE Unit Dose Versorgung statt

**Vielen Dank,**  
**dass Sie sich die Zeit genommen haben!**
