# Supplementary material for: Arzneimitteltherapiesicherheit gefördert durch die interprofessionelle Zusammenarbeit von Arzt und Apotheker auf Intensivstationen in Deutschland
Source: Springer Nature journal article supplement (doi:10.1007/s00063-022-00898-5), 2022-03-08
Supplement: MOESM2 [file 20201404]

1 Zusatzmaterial Literatur -Recherche PUBMED:

| PMID,Title,Authors,Citation,First Author,Journal/Book,Publication Year<br>(critical care[MeSH Terms]) AND (pharmacist[MeSH Terms])07.09.2021                                                                                                                                                                                                                                 |
|------------------------------------------------------------------------------------------------------------------------------------------------------------------------------------------------------------------------------------------------------------------------------------------------------------------------------------------------------------------------------|
| 34279579,"Perspectives from the frontline: A pharmacy department's response to the COVID-19 pandemic","Collins CD, West N, Sudekum DM, Hecht JP.,"Am J Health Syst Pharm. 2020 Aug 20                                                                                                                                                                                        |
| 34279575,"COVID-19 pandemic preparedness: A practical guide from clinical pharmacists' perspective","Ahuja T, Merchan C, Arnouk S, Cirrone F, Dabestani A, Papadopoulos J.,"Am J Health Syst Pharm. 2020 Sep 4                                                                                                                                                               |
| 33516718,"[Contribution of a hospital pharmacy team to critical care of patients infected with SARS-CoV-2]","Besson C, Chareyre S, Kirouani N, Jean-Jean S, Bretagnolle C, Henry A, Leboucher G, Charpiat B.,"Ann Pharm Fr. 2021 Jul                                                                                                                                         |
| 33438981,"Action Plan for Successful Implementation of Optimal ICU Pharmacist Activities: Next Steps for the Critical Care Pharmacist Position Paper","Murray B, Buckley MS, Newsome AS.,"Crit Care Med. 2021 Feb 1                                                                                                                                                          |
| 33274747,"Rising to the challenge: Pharmacy residents on the front lines during COVID-19 pandemic","Uchida E, Long-Fazio B, Marshall J, Fortier C.,"Am J Health Syst Pharm. 2020 Dec 4                                                                                                                                                                                       |
| 33166192,"Impact of a Pharmacist-Led Intensive Care Unit Sleep Improvement Protocol on Sleep Duration and Quality","Andrews JL, Louzon PR, Torres X, Pyles E, Ali MH, Du Y, Devlin JW.,"Ann Pharmacother. 2021 Jul                                                                                                                                                           |
| 33124653,"Justification of the value of critical care pharmacists: Still a work in progress?","Erstad BL.,"Am J Health Syst Pharm. 2020 Oct 30                                                                                                                                                                                                                               |
| 33038310,"The role of the critical care pharmacist during the COVID-19 pandemic","Lemtiri J, Matusik E, Cousein E, Lambiotte F, Elbeki N.,"Ann Pharm Fr. 2020 Nov                                                                                                                                                                                                            |
| 32844673,"Caring for the COVID Patient: A Clinical Pharmacist's Perspective","Erstad BL.,"Ann Pharmacother. 2021 Mar                                                                                                                                                                                                                                                         |
| 32789461,"The pharmacist's role in implementation of the ABCDEF bundle into clinical practice","Schmidt LE, Patel S, Stollings JL.,"Am J Health Syst Pharm. 2020 Oct 14                                                                                                                                                                                                      |
| 32620973,"ICU pharmacist describes challenges in COVID-19 care","Traynor K.,"Am J Health Syst Pharm. 2020 Jul 23                                                                                                                                                                                                                                                             |
| 32533669,"Hospital Pharmacy in the multidisciplinary team of COVID inpatient units","Gil-Navarro MV, Luque-Márquez R.,"Farm Hosp. 2020 Jun 12                                                                                                                                                                                                                                |
| 32533667,"Hospital Pharmacist experience in the Intensive Care Unit: Plan COVID","García-Gil M, Velayos-Amo C.,"Farm Hosp. 2020 Jun 12                                                                                                                                                                                                                                       |
| 32487967,"Interventions to ensure medication safety in acute care: an umbrella review","Khalil H, Kynoch K, Hines S.,"Int J Evid Based Healthc. 2020 Jun                                                                                                                                                                                                                     |
| 32468327,"Neurocritical Care Resource Utilization in Pandemics: A Statement by the Neurocritical Care Society","Moheet AM, Shapshak AH, Brissie MA, Abulhasan YB, Brophy GM, Frontera J, Hall WR, John S, Kalanuria AA, Kumar A, Lele AV, Mainali S, May CC, Mayer SA, McCredie V, Silva GS, Singh JM, Steinberg A, Sung G, Tesoro EP, Yakhkind A.,"Neurocrit Care. 2020 Aug |
| 32369877,"Intervention study for the reduction of medication errors in elderly trauma patients","Parro Martín MLÁ, Muñoz García M, Delgado Silveira E, Martín-Aragón Álvarez S, Bermejo Vicedo T.,"J Eval Clin Pract. 2021 Feb                                                                                                                                               |
| 32280966,"Evidence of burnout in critical care pharmacists","Ball AM, Schultheis J, Lee HJ, Bush PW.,"Am J Health Syst Pharm. 2020 May 7                                                                                                                                                                                                                                     |
| 32145656,"Improving medication safety in the Intensive Care by identifying relevant drug-drug interactions - Results of a multicenter Delphi study","Bakker T, Klopotoska JE, de Keizer NF, van Marum R, van der Sijs H, de Lange DW, de Jonge E, Abu-Hanna A, Dongelmans DA                                                                                                 |
| 32122440,"An investigation into the number and nature of the urgent care consultations managed and referred by community pharmacists in South-East England","Dodds L, Katusiime B, Shamim A, Fleming G, Thomas T.,"Prim Health Care Res Dev. 2020 Mar 3                                                                                                                      |
| 32070269,"Interventions of a clinical pharmacist in a medical intensive care unit - A retrospective analysis","Cvikl M, Sinkovič A.,"Bosn J Basic Med Sci. 2020 Feb 10                                                                                                                                                                                                       |
| 31738262,"The authors reply","Lee H, Suh GY, Kim E.,"Crit Care Med. 2019 Dec                                                                                                                                                                                                                                                                                                 |
| 31738261,"Pharmacists Are Associated With Reduced Mortality in Critically Ill Patients: Now What?","Newsome AS, Jones TW, Smith SE.,"Crit Care Med. 2019 Dec                                                                                                                                                                                                                 |
| 31728749,"A survey of antibiotic administration practices involving patients with sepsis in UK critical care units","Barton GJ, Morecroft CW, Henney NC.,"Int J Clin Pharm. 2020 Feb                                                                                                                                                                                         |
| 31705641,"Nationwide current situation of hospital pharmacists in intensive care units","Valera-Rubio M, Domingo-Chiva E, Aquerreta-González I, Periañez-Párraga L, Ruiz-Ramos J, Soy-Muner D.,"Farm Hosp. 2019 Nov 1                                                                                                                                                        |

|                                                                                                                                                                                                                                                                           |
|---------------------------------------------------------------------------------------------------------------------------------------------------------------------------------------------------------------------------------------------------------------------------|
| 31694386,"Pathophysiology of Volume Administration in Septic Shock and the Role of the Clinical Pharmacist","Bissell BD, Mefford B.", "Ann Pharmacother. 2020 Apr                                                                                                         |
| 31595449,"Integrating a pharmacist into an anaesthesiology and critical care department: Is this worthwhile?","Chapuis C, Albaladejo P, Billon L, Catoire C, Chanoine S, Allenet B, Bouzat P, Bedouch P, Payen JF.", "Int J Clin Pharm. 2019 Dec                          |
| 31544470,"Clinical Pharmacist-Led Impact on Inappropriate Albumin Use and Costs in the Critically Ill","Buckley MS, Knutson KD, Agarwal SK, Lansburg JM, Wicks LM, Saggar RC, Richards EC, Kopp BJ, Erstad BL.", "Ann Pharmacother. 2020 Feb                              |
| 31532504,"Select topics in the management of critically ill children","Hughes K, Buenger L.", "Am J Health Syst Pharm. 2019 Sep 16                                                                                                                                        |
| 31415315,"The Bedside Critical Care Pharmacist: A Mandatory ICU Team Member Essential for Patient Care","MacLaren R, Devlin JW.", "Crit Care Med. 2019 Sep                                                                                                                |
| 31332648,"A new approach on assessing clinical pharmacists' impact on prescribing errors in a surgical intensive care unit","Kessemeier N, Meyn D, Hoeckel M, Reitze J, Culmsee C, Tryba M.", "Int J Clin Pharm. 2019 Oct                                                 |
| 31301641,"Moral distress in intensive care unit personnel is not consistently associated with adverse medication events and other adverse events","Dodek P, Norena M, Ayas N, Dhingra V, Brown G, Wong H.", "J Crit Care. 2019 Oct                                        |
| 31192553,"Nutrition support for critically ill patients in China: role of the pharmacist","Zhou X, Qiu F, Wan D, Sun S, Yao G, Liu Y, Li J.", "Asia Pac J Clin Nutr. 2019                                                                                                 |
| 31175567,"Worldwide Organization of Neurocritical Care: Results from the PRINCE Study Part 1","Suarez JI, Martin RH, Bauza C, Georgiadis A, Venkatasubba Rao CP, Calvillo E, Hemphill JC 3rd, Sung G, Oddo M, Taccone FS, LeRoux PD                                       |
| 31135496,"Impact on Patient Outcomes of Pharmacist Participation in Multidisciplinary Critical Care Teams: A Systematic Review and Meta-Analysis","Lee H, Ryu K, Sohn Y, Kim J, Suh GY, Kim E.", "Crit Care Med. 2019 Sep                                                 |
| 30637792,"Pharmacotherapy Rounds: When Old Drugs Require New Guidelines","DeVane CL.", "Pharmacotherapy. 2019 Jan                                                                                                                                                         |
| 30623457,"The Optimal Use of the Polymyxins Before Their Time Is Up","Alosaimy S, Jorgensen SCJ, Rybak MJ.", "Pharmacotherapy. 2019 Jan                                                                                                                                   |
| 30355597,"Perceptions of critical care pharmacists participating in a formal mentor-mentee program","Hammond DA, Holt TR, Harris SA, Caylor MM, Kopp BJ, Hamblin S.", "Am J Health Syst Pharm. 2018 Nov 1                                                                 |
| 30253681,"Medication safety in a German telemedicine centre: Implementation of a telepharmaceutical expert consultation in addition to existing tele-intensive care unit services","Amkreutz J, Lenssen R, Marx G, Deisz R, Eisert A.", "J Telemed Telecare. 2020 Jan-Feb |
| 30187762,"Comment: Critical Care Pharmacists and Medication Management in an ICU Recovery Center","Wanat MA, Fitousis K.", "Ann Pharmacother. 2019 Jan                                                                                                                    |
| 30175590,"Reply: Critical Care Pharmacists and Medication Management in an ICU Recovery Center","Stollings JL, Bloom SL, Sevin CM.", "Ann Pharmacother. 2019 Jan                                                                                                          |
| 30173635,"Hospital Pharmacy and Critical Care Medicine: a necessary alliance","Martin-Delgado MC, Calleja-Hernández MÁ.", "Farm Hosp. 2018 Sep 1                                                                                                                          |
| 29523535,"Association between postgraduate year 2 residency program characteristics and primary project publication","Swanson JM, Shafeeq H, Hammond DA, Li C, Devlin JW.", "Am J Health Syst Pharm. 2018 Mar 15                                                          |
| 29457491,"Critical Care Pharmacists and Medication Management in an ICU Recovery Center","Stollings JL, Bloom SL, Wang L, Ely EW, Jackson JC, Sevin CM.", "Ann Pharmacother. 2018 Aug                                                                                     |
| 29337793,"Expanding the Reach of Critical Care Pharmacists Globally","Devlin JW, McKenzie C.", "Crit Care Med. 2018 Feb                                                                                                                                                   |
| 29314430,"Reducing medication errors in critical care patients: pharmacist key resources and relationship with medicines optimisation","Bourne RS, Shulman R, Jennings JK.", "Int J Pharm Pract. 2018 Dec                                                                 |
| 29024199,"Critical care pharmacy workforce: UK deployment and characteristics in 2015","Borthwick M, Barton G, Bourne RS, McKenzie C.", "Int J Pharm Pract. 2018 Aug                                                                                                      |
| 28982305,"Advanced Modes of Mechanical Ventilation: Introduction for the Critical Care Pharmacist","Cawley MJ.", "J Pharm Pract. 2019 Apr                                                                                                                                 |
| 28874082,"Impact of Multiple Daily Clinical Pharmacist-Enforced Assessments on Time in Target Sedation Range","Lizza BD, Jagow B, Hensler D, Cooper CJ, Short EJ, Maas MB, Naidech AM, Wunderink RG.", "J Pharm Pract. 2018 Oct                                           |
| 28453820,"Reliability of clinical impact grading by healthcare professionals of common prescribing error and optimisation cases in critical care patients","Bourne RS, Shulman R, Tomlin M, Borthwick M, Berry W, Mills GH.", "Int J Qual Health Care. 2017 Apr 1         |

|                                                                                                                                                                                                                                                                                                                                                                |
|----------------------------------------------------------------------------------------------------------------------------------------------------------------------------------------------------------------------------------------------------------------------------------------------------------------------------------------------------------------|
| 28357623,"Impact of pharmaceutical care on pain and agitation in a medical intensive care unit in Thailand", "Dilokpattanamongkol P, Tangsujaritvijit V, Suansanae T, Suthisisang C.", "Int J Clin Pharm. 2017 Jun                                                                                                                                             |
| 28183302,"The effect of the TIM program (Transfer ICU Medication reconciliation) on medication transfer errors in two Dutch intensive care units: design of a prospective 8-month observational study with a before and after period", "Bosma BE, Meuwese E, Tan SS, van Bommel J, Melief PH, Hunfeld NG, van den Bemt PM.", "BMC Health Serv Res. 2017 Feb 10 |
| 28012426,"Perceived safety and efficacy of neuromuscular blockers for acute respiratory distress syndrome among medical intensive care unit practitioners: A multicenter survey", "Torbic H, Bauer SR, Personett HA, Dzierba AL, Stollings JL, Ryder LP, Daniels CE, Caples SM, Frazee EN.", "J Crit Care. 2017 Apr                                            |
| 27699912,"PROTECTED-UK - Clinical pharmacist interventions in the UK critical care unit: exploration of relationship between intervention, service characteristics and experience level", "Rudall N, McKenzie C, Landa J, Bourne RS, Bates I, Shulman R.", "Int J Pharm Pract. 2017 Aug                                                                        |
| 27543598,"Impact of a pharmacist-driven protocol to decrease proton pump inhibitor use in non-intensive care hospitalized adults", "Michal J, Henry T, Street C.", "Am J Health Syst Pharm. 2016 Sep 1                                                                                                                                                         |
| 27440623,"Comparison of medication safety systems in critical access hospitals: Combined analysis of two studies", "Cochran GL, Barrett RS, Horn SD.", "Am J Health Syst Pharm. 2016 Aug 1                                                                                                                                                                     |
| 27374959,"[Involvement of Pharmacists in Medical Care in Emergency and Critical Care Centers]", "Imai T, Yoshida Y.", "Yakugaku Zasshi. 2016                                                                                                                                                                                                                   |
| 27179814,"Should $\beta$ -lactam antibiotics be administered by continuous infusion in critically ill patients? A survey of Australia and New Zealand intensive care unit doctors and pharmacists", "Cotta MO, Dulhunty JM, Roberts JA, Myburgh J, Lipman J.", "Int J Antimicrob Agents. 2016 Jun                                                              |
| 26777752,"Impact of the introduction of a specialist critical care pharmacist on the level of pharmaceutical care provided to the critical care unit", "Richter A, Bates I, Thacker M, Jani Y, O'Farrell B, Edwards C, Taylor H, Shulman R.", "Int J Pharm Pract. 2016 Aug                                                                                     |
| 26643860,"Use of probiotics to prevent ventilator-associated pneumonia: A survey of pharmacists' attitudes", "Wheeler KE, Cook DJ, Mehta S, Calce A, Guenette M, Perreault MM, Thiboutot Z, Duffett M, Burry L.", "J Crit Care. 2016 Feb                                                                                                                       |
| 26581938,"History and future of critical care pharmacy practice", "Benedict N, Hess MM.", "Am J Health Syst Pharm. 2015 Dec 1                                                                                                                                                                                                                                  |
| 26420309,"Pharmacist independent prescribing in critical care: results of a national questionnaire to establish the 2014 UK position", "Bourne RS, Whiting P, Brown LS, Borthwick M.", "Int J Pharm Pract. 2016 Apr                                                                                                                                            |
| 26260916,"Effect of critical care pharmacist's intervention on medication errors: A systematic review and meta-analysis of observational studies", "Wang T, Benedict N, Olsen KM, Luan R, Zhu X, Zhou N, Tang H, Yan Y, Peng Y, Shi L.", "J Crit Care. 2015 Oct                                                                                                |
| 26077045,"Do we need a pharmacist in the ICU?", "Chant C, Dewhurst NF, Friedrich JO.", "Intensive Care Med. 2015 Jul                                                                                                                                                                                                                                           |
| 25971871,"Pharmacist's review and outcomes: Treatment-enhancing contributions tallied, evaluated, and documented (PROTECTED-UK)", "Shulman R, McKenzie CA, Landa J, Bourne RS, Jones A, Borthwick M, Tomlin M, Jani YH, West D, Bates I                                                                                                                        |
| 25907528,"Pharmacist leadership in ICU quality improvement: coordinating spontaneous awakening and breathing trials", "Stollings JL, Foss JJ, Ely EW, Ambrose AM, Rice TW, Girard TD, Wheeler AP.", "Ann Pharmacother. 2015 Aug                                                                                                                                |
| 25768966,"Impact of nursing education by a pharmacist on sedation practice in a trauma surgical intensive care unit", "Reinaker TS, Frock KM.", "J Trauma Nurs. 2015 Mar-Apr                                                                                                                                                                                   |
| 25666942,"Role of an electronic antimicrobial alert system in intensive care in dosing errors and pharmacist workload", "Claus BO, Colpaert K, Steurbaut K, De Turck F, Vogelaers DP, Robays H, Decruyenaere J.", "Int J Clin Pharm. 2015 Apr                                                                                                                  |
| 25470782,"Expected net benefit of clinical pharmacy in intensive care medicine: a randomized interventional comparative trial with matched before-and-after groups", "Claus BO, Robays H, Decruyenaere J, Annemans L.", "J Eval Clin Pract. 2014 Dec                                                                                                           |
| 25310233,"Making decisions about medications in critically ill children: a survey of Canadian pediatric critical care clinicians", "Duffett M, Choong K, Vanniyasingam T, Thabane L, Cook DJ.", "Pediatr Crit Care Med. 2015 Jan                                                                                                                               |
| 25153537,"Improving antimicrobial dosing in critically ill patients receiving continuous venovenous hemofiltration and the effect of pharmacist dosing adjustment", "Jiang SP, Xu YY, Ping-Yang, Wu WF, Zhang XG, Lu XY, Xiao YH, Liang WF, Chen J.", "Eur J Intern Med. 2014 Dec                                                                              |
| 24401078,"Degree of knowledge of health care professionals about pain management and use of opioids in pediatrics", "de Freitas GR, de Castro CG Jr, Castro SM, Heineck I.", "Pain Med. 2014 May                                                                                                                                                               |

|                                                                                                                                                                                                                                                                                                             |
|-------------------------------------------------------------------------------------------------------------------------------------------------------------------------------------------------------------------------------------------------------------------------------------------------------------|
| 24256015,"[Risk management at an Intensive Care Department: conciliation of medication]","Becerril Moreno F, Bustamante Munguira E, García Verdejo JA, Bartual Lobato E, Ros Martínez M, Merino de Cós P.", "Farm Hosp. 2013 Nov-Dec                                                                        |
| 24189862,"Pharmacist contributions as members of the multidisciplinary ICU team","Preslaski CR, Lat I, MacLaren R, Poston J.", "Chest. 2013 Nov                                                                                                                                                             |
| 24024759,"Impact of pharmacist antimicrobial dosing adjustments in septic patients on continuous renal replacement therapy in an intensive care unit","Jiang SP, Zhu ZY, Ma KF, Zheng X, Lu XY.", "Scand J Infect Dis. 2013 Dec                                                                             |
| 24002430,"The role of the pharmacist in the intensive care unit","Jurado LV, Steelman JD.", "Crit Care Nurs Q. 2013 Oct-Dec                                                                                                                                                                                 |
| 24002429,"The impact of drug shortages on the pharmacy, nursing, and medical staff's ability to effectively care for critically ill patients","Gulbis BE, Ruiz MC, Denktas AE.", "Crit Care Nurs Q. 2013 Oct-Dec                                                                                            |
| 23763333,"Proactive clinical pharmacist interventions in critical care: effect of unit speciality and other factors","Bourne RS, Choo CL, Dorward BJ.", "Int J Pharm Pract. 2014 Apr                                                                                                                        |
| 23719871,"BPS approves critical care, pediatrics specialty certification","Traynor K.", "Am J Health Syst Pharm. 2013 Jun 15                                                                                                                                                                                |
| 23468188,"Clinical and financial impact of pharmacy services in the intensive care unit: pharmacist and prescriber perceptions","MacLaren R, Brett McQueen R, Campbell J.", "Pharmacotherapy. 2013 Apr                                                                                                      |
| 23208037,"[Education of clinical pharmacy specialists in critical care in Japan]","Maeda M.", "Yakugaku Zasshi. 2012                                                                                                                                                                                        |
| 22932309,"Canadian survey of critical care pharmacists' views and involvement in clinical research","Perreault MM, Thiboutot Z, Burry LD, Rose L, Kanji S, LeBlanc JM, Carr RR, Williamson DR.", "Ann Pharmacother. 2012 Sep                                                                                |
| 22354852,"Pharmacist proactive medication recommendations using electronic documentation in a UK general critical care unit","Bourne RS, Choo CL.", "Int J Clin Pharm. 2012 Apr                                                                                                                             |
| 22348303,"Interventions to reduce medication errors in adult intensive care: a systematic review","Manias E, Williams A, Liew D.", "Br J Clin Pharmacol. 2012 Sep                                                                                                                                           |
| 22154447,"[Second wave of the French drug harmonisation programme to prevent medication errors: overall appreciation of healthcare professionals]","Benhamou D, Nacry R, Journois D, Auroy Y, Durand D, Arnoux A, Olier L, Castot A.", "Ann Fr Anesth Reanim. 2012 Jan                                      |
| 21934036,"Current perceptions and practices surrounding the recognition and treatment of delirium in the intensive care unit: a survey of 250 critical care pharmacists from eight states","Devlin JW, Bhat S, Roberts RJ, Skrobik Y.", "Ann Pharmacother. 2011 Oct                                         |
| 21275491,"Interdisciplinary patient care in the intensive care unit: focus on the pharmacist","Erstad BL, Haas CE, O'Keeffe T, Hokula CA, Parrinello K, Theodorou AA.", "Pharmacotherapy. 2011 Feb                                                                                                          |
| 20445206,"End-of-life issues: an occupational therapy and pharmacy perspective","Reyner K.", "Am J Hosp Palliat Care. 2010 May                                                                                                                                                                              |
| 20164471,"Evaluation of the impact of a tele-ICU pharmacist on the management of sedation in critically ill mechanically ventilated patients","Forni A, Skehan N, Hartman CA, Yogaratnam D, Njoroge M, Schifferdecker C, Lilly CM.", "Ann Pharmacother. 2010 Mar                                            |
| 20065268,"Reliability and accuracy of practitioner-calculated Acute Physiology and Chronic Health Evaluation II scores for determining the appropriateness of drotrecogin alfa (activated)","Owen PS, Tan EC, Kiser TH, Fish DN, MacLaren R.", "Am J Health Syst Pharm. 2010 Jan 15                         |
| 19996586,"Implementation of practice guidelines for antifungal therapy in a surgical intensive care unit and its impact on use and costs","Swoboda S, Lichtenstern C, Ober MC, Taylor LA, Störzinger D, Michel A, Brobeil A, Mieth M, Hofer S, Sonntag HG, Hoppe-Tichy T, Weigand MA.", "Chemotherapy. 2009 |
| 19792995,"Key articles and guidelines relative to intensive care unit pharmacotherapy: 2009 update","Erstad BL, Brophy GM, Martin SJ, Haas CE, Devlin JW, Welage LS, Dager WE.", "Pharmacotherapy. 2009 Oct                                                                                                 |
| 19558249,"Effects of pharmacist participation in intensive care units on clinical and economic outcomes of critically ill patients with thromboembolic or infarction-related events","MacLaren R, Bond CA.", "Pharmacotherapy. 2009 Jul                                                                     |
| 19386940,"Preliminary national survey of pharmacist involvement in trauma resuscitation","Hale LS, Nyberg SM, Mohr AM, Wegner-Busch EK.", "Am J Health Syst Pharm. 2009 May 1                                                                                                                               |
| 19272541,"Perceived barriers to the use of sedation protocols and daily sedation interruption: a multidisciplinary survey","Tanios MA, de Wit M, Epstein SK, Devlin JW.", "J Crit Care. 2009 Mar                                                                                                            |
| 19020439,"Clinical pharmacist on intensive care unit saves lives and reduces costs","Knibbe CA, Tjoeng MM.", "Crit Care Med. 2008 Dec                                                                                                                                                                       |
| 19017823,"A primer on critical care pharmacy services","Erstad BL.", "Ann Pharmacother. 2008 Dec                                                                                                                                                                                                            |
| 18936700,"Clinical and economic outcomes of involving pharmacists in the direct care of critically ill patients with infections","MacLaren R, Bond CA, Martin SJ, Fike D.", "Crit Care Med. 2008 Dec                                                                                                        |

|                                                                                                                                                                                                                                                                    |
|--------------------------------------------------------------------------------------------------------------------------------------------------------------------------------------------------------------------------------------------------------------------|
| 17987280,"International critical care hospital pharmacist activities", "LeBlanc JM, Seoane-Vazquez EC, Arbo TC, Dasta JF.", "Intensive Care Med. 2008 Mar                                                                                                          |
| 17725263,"Dangerous abbreviations: ""U"" can make a difference!", "Koczmaro C, Jelincic V, Dueck C.", "Dynamics. 2005 Fall                                                                                                                                         |
| 17723113,"Practical considerations when developing guidelines for managing critical bleeding", "Rebuck JA.", "Pharmacotherapy. 2007 Sep                                                                                                                            |
| 17723112,"Key concepts in the management of difficult hemorrhagic cases", "MacLaren R.", "Pharmacotherapy. 2007 Sep                                                                                                                                                |
| 17723109,"Update on transfusion medicine", "Shander A, Goodnough LT.", "Pharmacotherapy. 2007 Sep                                                                                                                                                                  |
| 17723108,"Causes and consequences of critical bleeding and mechanisms of blood coagulation", "Zimmerman LH.", "Pharmacotherapy. 2007 Sep                                                                                                                           |
| 17536876,"Incidence and nature of medication errors in neonatal intensive care with strategies to improve safety: a review of the current literature", "Chedoe I, Molendijk HA, Dittrich ST, Jansman FG, Harting JW, Brouwers JR, Taxis K.", "Drug Saf. 2007       |
| 16679898,"A prospective study of the impact of a critical care pharmacist assigned as a member of the multidisciplinary burn care team", "Patel NP, Brandt CP, Yowler CJ.", "J Burn Care Res. 2006 May-Jun                                                         |
| 16482393,"How to increase return on investment of the intensive care pharmacist - fear of flying", "Hartmann M, Meier-Hellmann A.", "Intensive Care Med. 2006 Apr                                                                                                  |
| 16477202,"The critical care clinical pharmacist: evolution of an essential team member", "Horn E, Jacobi J.", "Crit Care Med. 2006 Mar                                                                                                                             |
| 16278319,"Prevention of venous thromboembolism in the medically ill", "Brouse SD.", "Am J Health Syst Pharm. 2005 Nov 15                                                                                                                                           |
| 12870489,"National quality forum endorses four new patient safety practices", "Rollins G.", "Rep Med Guidel Outcomes Res. 2003 May 16                                                                                                                              |
| 12432975,"The critical care pharmacist: an essential intensive care practitioner", "Papadopoulos J, Rebuck JA, Lober C, Pass SE, Seidl EC, Shah RA, Sherman DS.", "Pharmacotherapy. 2002 Nov                                                                       |
| 9184706,"The effect of ICU sedation guidelines and pharmacist interventions on clinical outcomes and drug cost", "Devlin JW, Holbrook AM, Fuller HD.", "Ann Pharmacother. 1997 Jun                                                                                 |
| 8205822,"The critical care pharmacist: what you get is more than what you see", "Dasta JF, Jacob J.", "Crit Care Med. 1994 Jun                                                                                                                                     |
| 7919577,"New (renamed) critical care journal", "Vaughan LM.", "Ann Pharmacother. 1994 Jun                                                                                                                                                                          |
| 1611166,"Critical care pharmacy update", "Dasta JF.", "Ann Pharmacother. 1992 Jun                                                                                                                                                                                  |
| 1529986,"Multidisciplinary drug-use evaluation for stress ulcer prophylaxis", "Hatton J.", "Am J Hosp Pharm. 1992 Jun                                                                                                                                              |
| 1815447,"Pharmacist involvement in Society of Critical Care Medicine", "Dasta JF, Jacobi J.", "DICP. 1991 Dec                                                                                                                                                      |
| 1905438,"Pharmacist interventions improve fluid balance in fluid-restricted patients requiring parenteral nutrition", "Broyles JE, Brown RO, Vehe KL, Nolly RJ, Luther RW.", "DICP. 1991 Feb                                                                       |
| 2125394,"Pharmacoeconomics: therapeutic and economic considerations in treating the critically ill patient", "Crane VS.", "DICP. 1990 Nov                                                                                                                          |
| 3847770,"Clinical pharmacist: emerging member of the NICU team", "Bryant BG.", "Neonatal Netw. 1985 Jun                                                                                                                                                            |
| 14014633,"What the pharmacist should do to help intensive patient care", "BOWLES G Jr.", "Mod Hosp. 1963 Jan                                                                                                                                                       |
| PMID,Title,Authors,Citation,First Author,Journal/Book,Publication Year<br>(critical care[MeSH Terms]) AND (pharmacy[MeSH Terms]) 07.09.2021                                                                                                                        |
| 32233830,"Pharmacy Personnel's Involvement in Transitions of Care of Intensive Care Unit Patients: A Systematic Review", "Rice M, Lear A, Kane-Gill S, Seybert AL, Smithburger PL.", "J Pharm Pract. 2021 Feb                                                      |
| 29523535,"Association between postgraduate year 2 residency program characteristics and primary project publication", "Swanson JM, Shafeeq H, Hammond DA, Li C, Devlin JW.", "Am J Health Syst Pharm. 2018 Mar 15                                                  |
| 29024199,"Critical care pharmacy workforce: UK deployment and characteristics in 2015", "Borthwick M, Barton G, Bourne RS, McKenzie C.", "Int J Pharm Pract. 2018 Aug                                                                                              |
| 27498360,"Granting Order-Writing Privileges to Registered Dietitian Nutritionists Can Decrease Costs in Acute Care Hospitals", "Phillips W, Doley J.", "J Acad Nutr Diet. 2017 Jun                                                                                 |
| 22932309,"Canadian survey of critical care pharmacists' views and involvement in clinical research", "Perreault MM, Thiboutot Z, Burry LD, Rose L, Kanji S, LeBlanc JM, Carr RR, Williamson DR.", "Ann Pharmacother. 2012 Sep                                      |
| 22742644,"Statin therapy in critical illness: an international survey of intensive care physicians' opinions, attitudes and practice", "Shankar-Hari M, Kruger PS, Di Gangi S, Scales DC, Perkins GD, McAuley DF, Terblanche M.", "BMC Clin Pharmacol. 2012 Jun 28 |

|                                                                                                                                                            |
|------------------------------------------------------------------------------------------------------------------------------------------------------------|
| 20633097,"Creating a shared formulary in 7 critical access hospitals", "Wakefield DS, Ward MM, Loes JL, O'Brien J, Abbas N.", "J Rural Health. 2010 Summer |
| 7600823,"Critical care pharmacists: the bridge tenders", "Whipple JK, Quebbeman EJ, Wallace JR, Ausman R.", "Crit Care Med. 1995 Jul                       |
| 7094842,"The critically ill or injured patient: priorities in management", "Majerus TC.", "Drug Intell Clin Pharm. 1982 Jun                                |

2  
3  
4
